# Supplementary material for: Intratumor Heterogeneity in Uveal Melanoma BAP-1 Expression
Source: PubMed Central journal article supplement (PMC7962103; doi:10.3390/cancers13051143), 2021-03-07
Supplement: cancers-13-01143-s001.pdf [file cancers-13-01143-s001.pdf]

---

**Setup parameters for digital image analysis of uveal melanoma BAP-1 expression**

---

|                                       |                      |
|---------------------------------------|----------------------|
| Requested pixel size                  | 0,5 $\mu\text{m}$    |
| <b>Nucleus parameters</b>             |                      |
| Background radius                     | 8 $\mu\text{m}$      |
| Median filter radius                  | 0 $\mu\text{m}$      |
| Sigma                                 | 1,5 $\mu\text{m}$    |
| Minimum area                          | 20 $\mu\text{m}^2$   |
| Maximum area                          | 300 $\mu\text{m}^2$  |
| <b>Intensity parameters</b>           |                      |
| Threshold                             | 0.1                  |
| Max background intensity              | 2                    |
| Split by shape                        | Yes                  |
| Exclude DAB                           | No                   |
| <b>Cell parameters</b>                |                      |
| Cell expansion                        | 6 $\mu\text{m}$      |
| Include cell nucleus                  | Yes                  |
| <b>General parameters</b>             |                      |
| Smooth boundaries                     | Yes                  |
| Make measurements                     | Yes                  |
| <b>Intensity threshold parameters</b> |                      |
| Score compartment                     | Nucleus: DAB OD Mean |
| Threshold 1+                          | 0.2                  |
| Threshold 2+                          | 0.4                  |
| Threshold 3+                          | 0.6                  |
| Single threshold                      | Yes                  |
